# Supplementary material for: Long-Term Circulation of Atypical Porcine Pestivirus (APPV) within Switzerland
Source: MDPI journal article supplement (doi:10.3390/v11070653), 2019-07-17
Supplement: s1 [file s1]

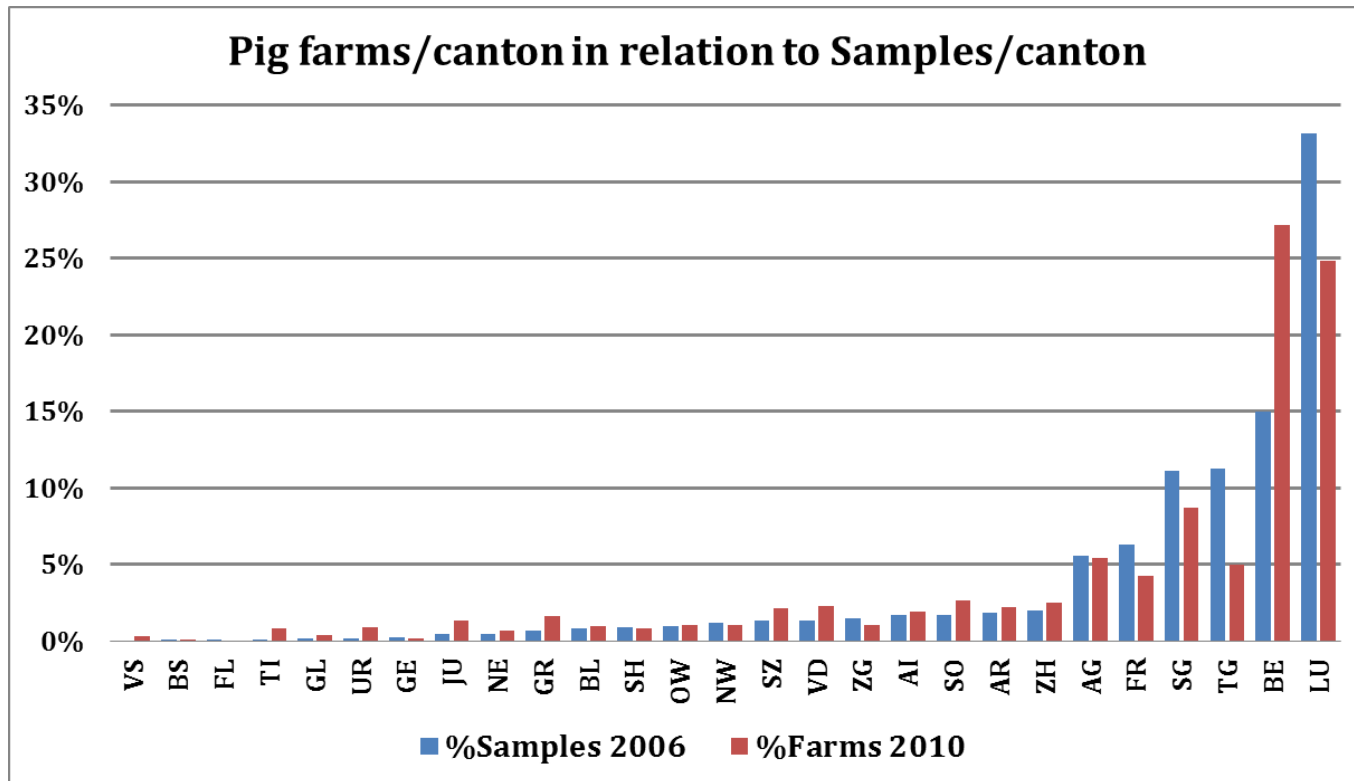

**Figure S1.** Relative numbers of pig farms per canton (data available for 2010) in relation to the number of samples analyzed in 2006 per canton in Switzerland.
